# Supplementary material for: Protective immunity against Helicobacter pylori induced by a single dose of an mRNA-based UreB vaccine candidate in mice
Source: Research Square preprint supplement (doi:10.21203/rs.3.rs-8837369/v1), 2026-02-23
Supplement: Supplementary file 1 [file d6b4c364ff3537478a68891f.docx]

1 2 3 4


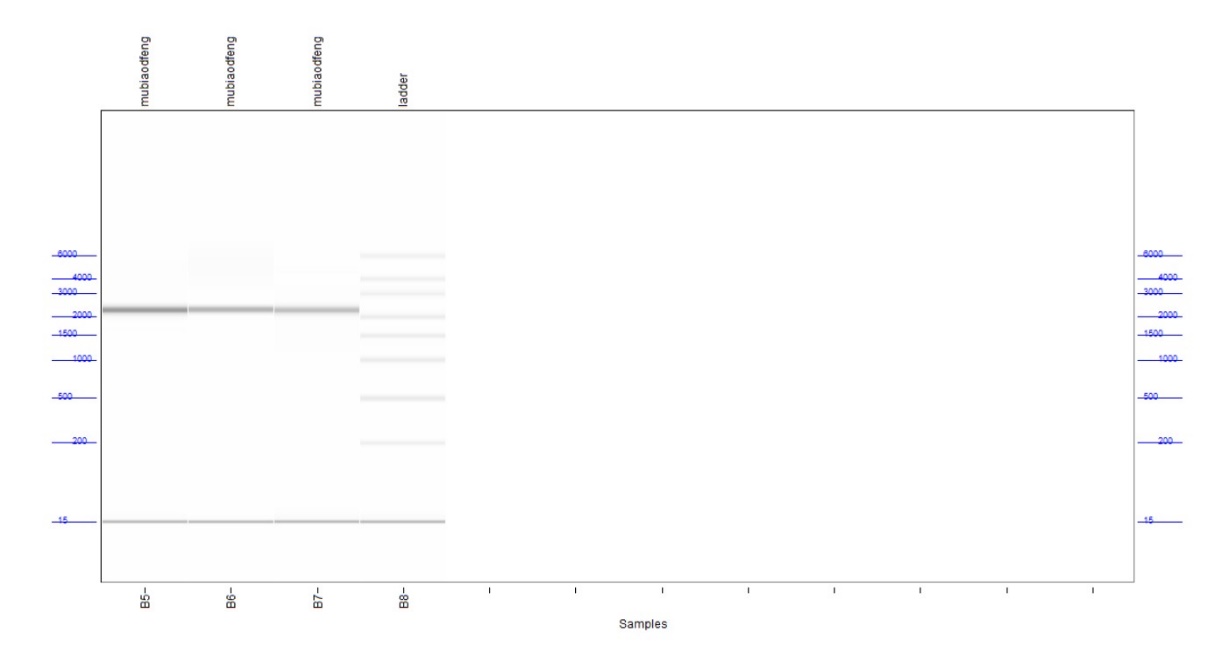


Additional file: Fig. S1 The length of mRNA-UreB was determined by capillary gel electrophoresis (CGE). Lane 1-3: mRNA-UreB: 2,200 nt; Lane 4: RNA marker.


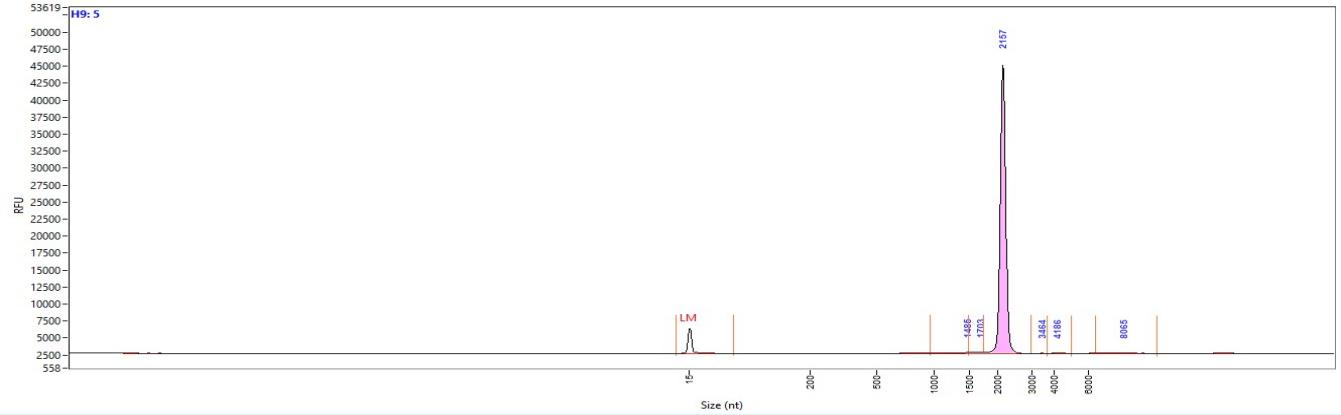


Additional file: Fig. S2 The integrity of mRNA-UreB was also detected by CGE. The integrity was approximately 97%.


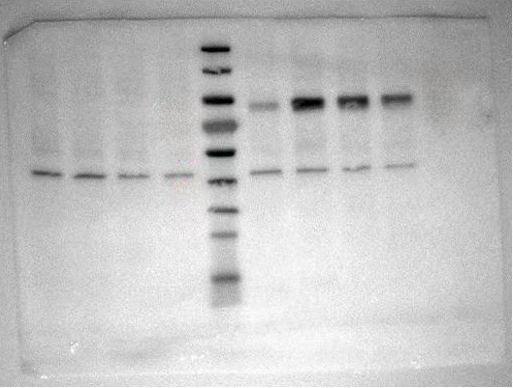


Additional file: Fig. S3 Uncut map of Western blotting.

| **LNP/mRNA-UreB Assay Specification** | |
| --- | --- |
| Encapsulation efficiency  Capping efficacy  Particle size  PDI  Zeta potential | ELISA 92.4%  LC-MS 96.2%  DLS 90-120nm  DLS ≤ 0.2  DLS 0-50 mV |

Additional file: Table 1 The quality control of LNP/mRNA-UreB.
